# Supplementary material
Source: HighWire-hosted journal article supplement (https://bmjopenquality.bmj.com/highwire/filestream/136067/field_highwire_adjunct_files/0/ds6167.docx)
Supplement: ds6167.docx [file ds6167.docx]

**
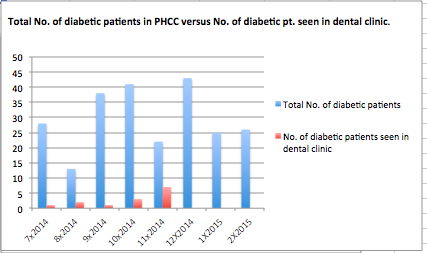
**

Figure 1: Total No. of diabetic patients versus No. of diabetic patients seen in dental clinic


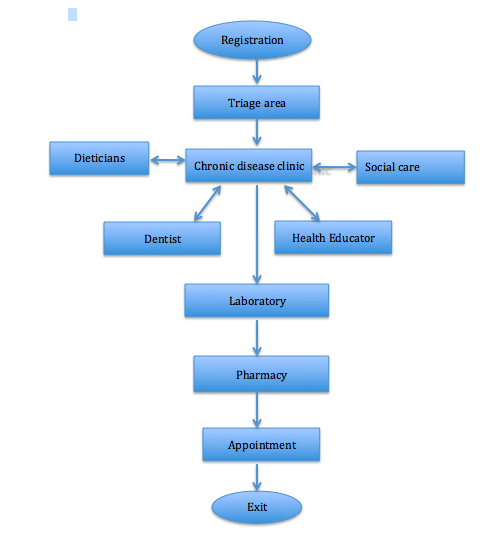


Figure 2: flow chart of diabetic patients in PHCC


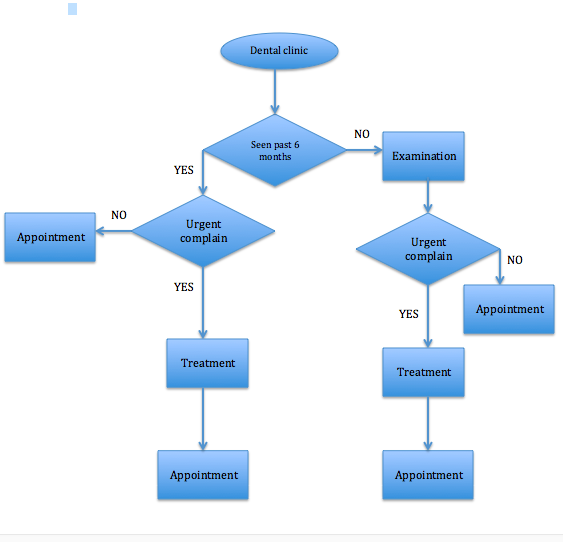


Figure 3: flow chart of diabetic patients in dental clinic
